# Supplementary material for: Amplification of active sites and porosity for the adsorption of QDs via the induction of the rare-earth element la into TiO2 for enhanced photovoltaic effects in QDSSCs
Source: Royal Society of Chemistry journal article supplement (doi:10.1039/d0nj03718d), 2020-01-01
Supplement: d0nj03718d1.pdf [file d0nj03718d1.pdf]

# Amplification of Active Sites and Porosity for QDs Adsorption Via Induction of Rare Earth Element La into TiO<sub>2</sub> for Boosting Photovoltaic Effect in QDSSC's

R. Shwetharani<sup>ab</sup>, T. Sushmitha<sup>a</sup>, G U Preethi<sup>a</sup>, R. Geetha Balakrishna<sup>a\*</sup>

*a: Centre for Nano and Material Sciences, Jain Global Campus, Jain University, Bangalore rural, 562112, India*

*b: Department of Chemistry, School of Engineering Technology, Jain University, Bangalore rural, 562112, India*

\*Corresponding author: br.geetha@jainuniversity.ac.in

## Supporting Information:

**Table S1.** Elemental analysis of TiO<sub>2</sub> and 4 % La-TiO<sub>2</sub>

| Material               | Element | Weight (%) | Atomic (%) |
|------------------------|---------|------------|------------|
| TiO <sub>2</sub>       | O K     | 46.08      | 71.9       |
|                        | Ti K    | 53.92      | 28.1       |
| 4 % LaTiO <sub>2</sub> | O K     | 29.66      | 60.53      |
|                        | Ti K    | 51.37      | 35.01      |
|                        | La L    | 18.97      | 4.46       |

**Table S2.** Elements present in La-TiO<sub>2</sub>/CdS/ZnS

| Element | Weight % | Atomic % |
|---------|----------|----------|
| O K     | 29.37    | 45.22    |
| S K     | 5.85     | 10.05    |

|            |       |       |
|------------|-------|-------|
| <b>CdL</b> | 13.65 | 6.69  |
| <b>TiK</b> | 35.55 | 30.52 |
| <b>LaL</b> | 10.35 | 4.11  |
| <b>ZnK</b> | 5.23  | 4.41  |

**Table S3.** BET surface area and pore volume values of TiO<sub>2</sub> and LaTiO<sub>2</sub>

| <b>Nanomaterial</b>    | <b>Surface area m<sup>2</sup>/g</b> | <b>Pore volume Cm<sup>3</sup>g<sup>-1</sup></b> | <b>Pore diameter nm</b> |
|------------------------|-------------------------------------|-------------------------------------------------|-------------------------|
| TiO <sub>2</sub>       | 17.2                                | 0.03384                                         | 8.9346                  |
| 1 % LaTiO <sub>2</sub> | 41.536                              | 0.0816                                          | 7.862                   |
| 2 % LaTiO <sub>2</sub> | 47.741                              | 0.0784                                          | 6.573                   |
| 3 % LaTiO <sub>2</sub> | 86.808                              | 0.2322                                          | 10.702                  |
| 4 % LaTiO <sub>2</sub> | 97.246                              | 0.255                                           | 10.49                   |
| 5 % LaTiO <sub>2</sub> | 61.595                              | 0.137                                           | 7.857                   |

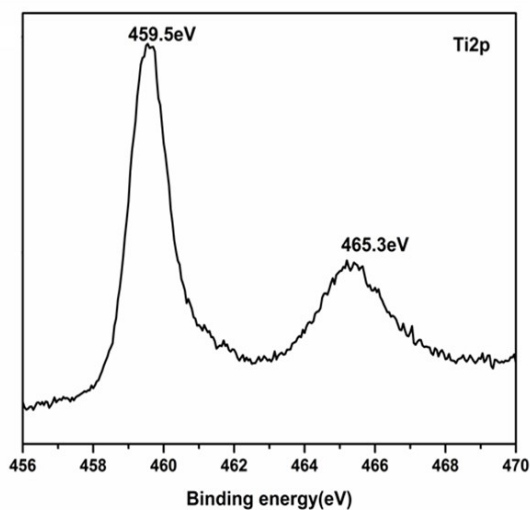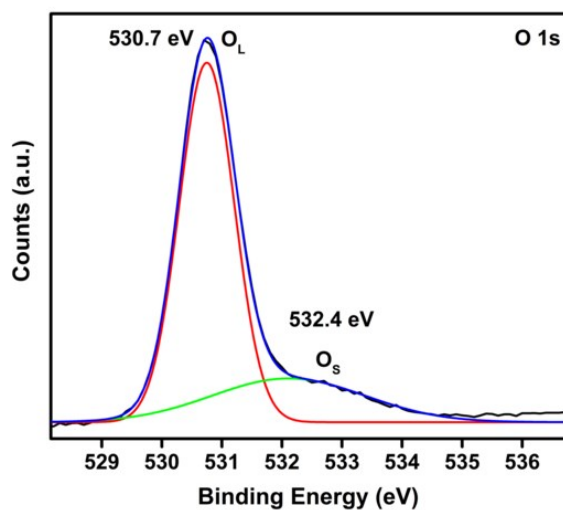

Figure S1. XPS spectra of Bare TiO<sub>2</sub>

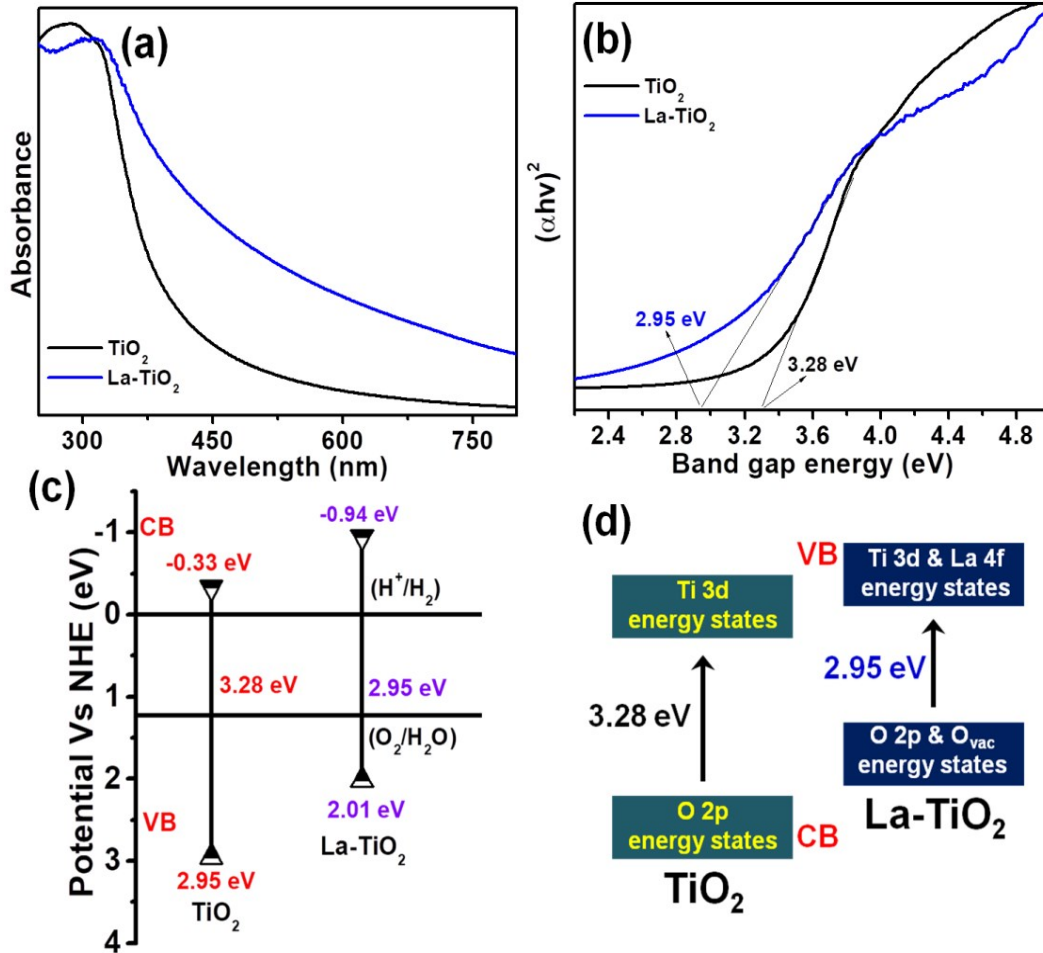

Figure S2 a) UV-visible absorption spectra of TiO<sub>2</sub> and 4% La-TiO<sub>2</sub> b) Tau plot of TiO<sub>2</sub> and 4% La-TiO<sub>2</sub> (c)-(d) Calculated and depicted band edge potential of TiO<sub>2</sub> and La-TiO<sub>2</sub>.

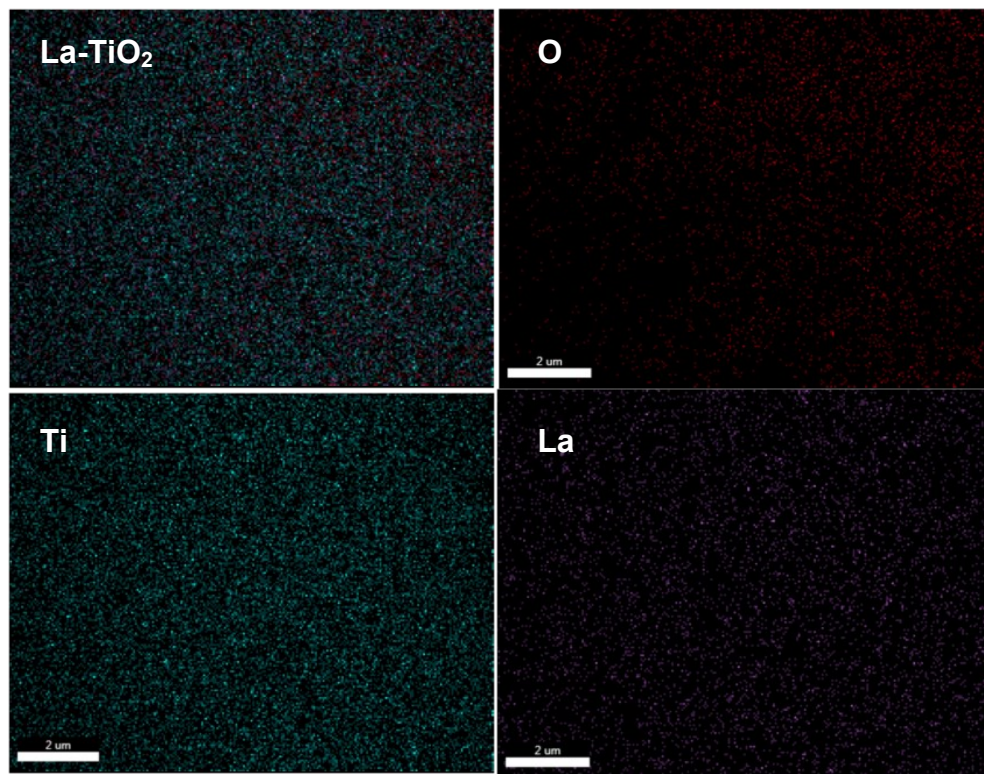

**Figure S3.** EDX mapping images of 4 % La-TiO<sub>2</sub>

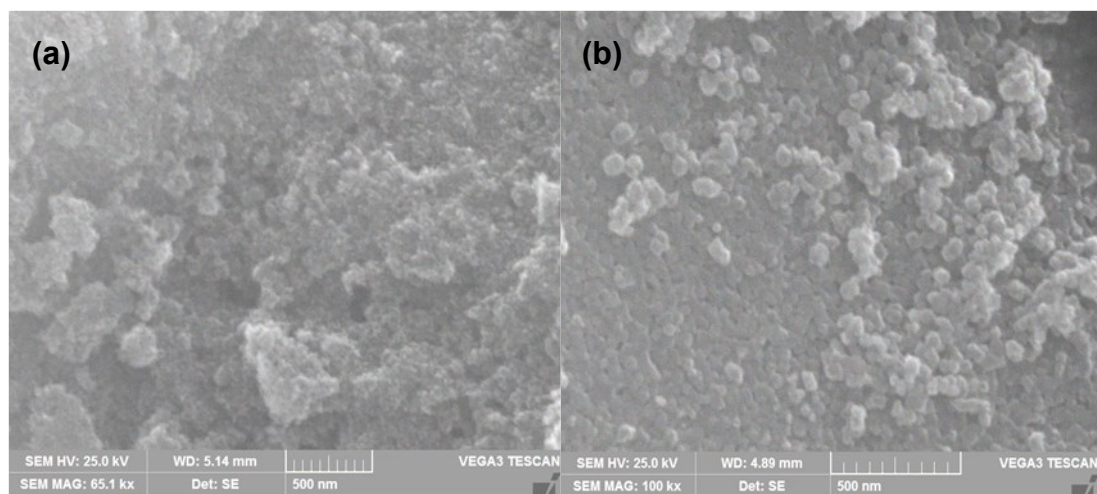

**Figure S4. SEM images of a) La-TiO<sub>2</sub>/CdS/ZnS b) TiO<sub>2</sub>/CdS/ZnS**

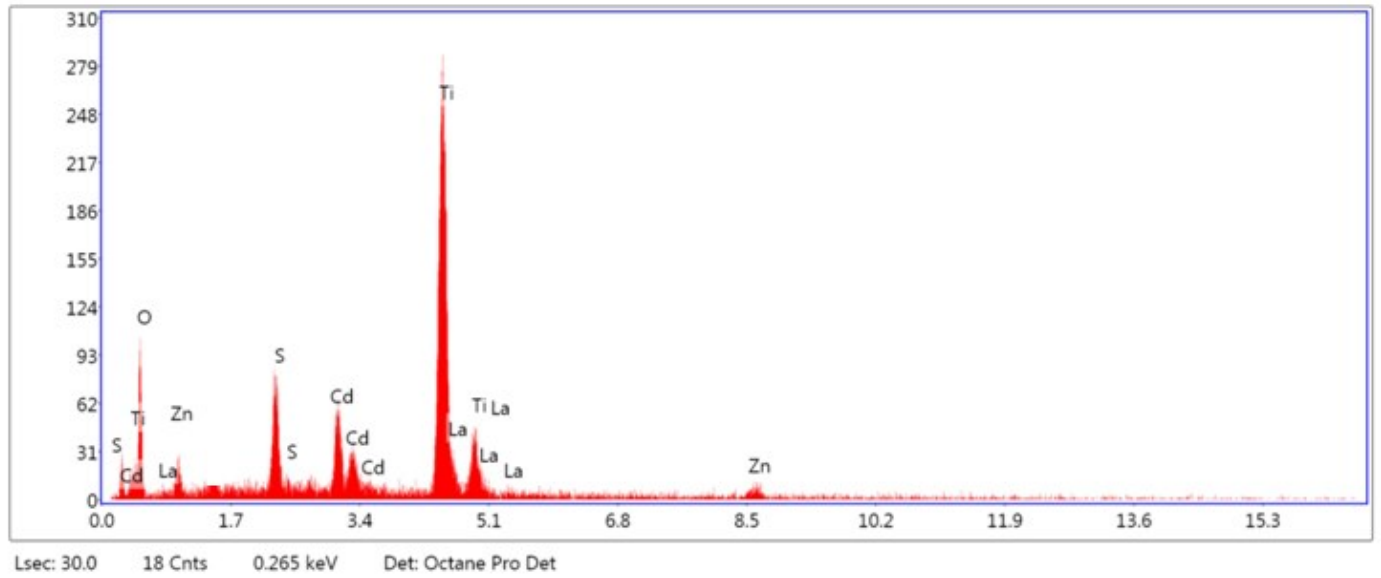

**Figure S5. EDX analysis curve of La-TiO<sub>2</sub>/CdS/ZnS**

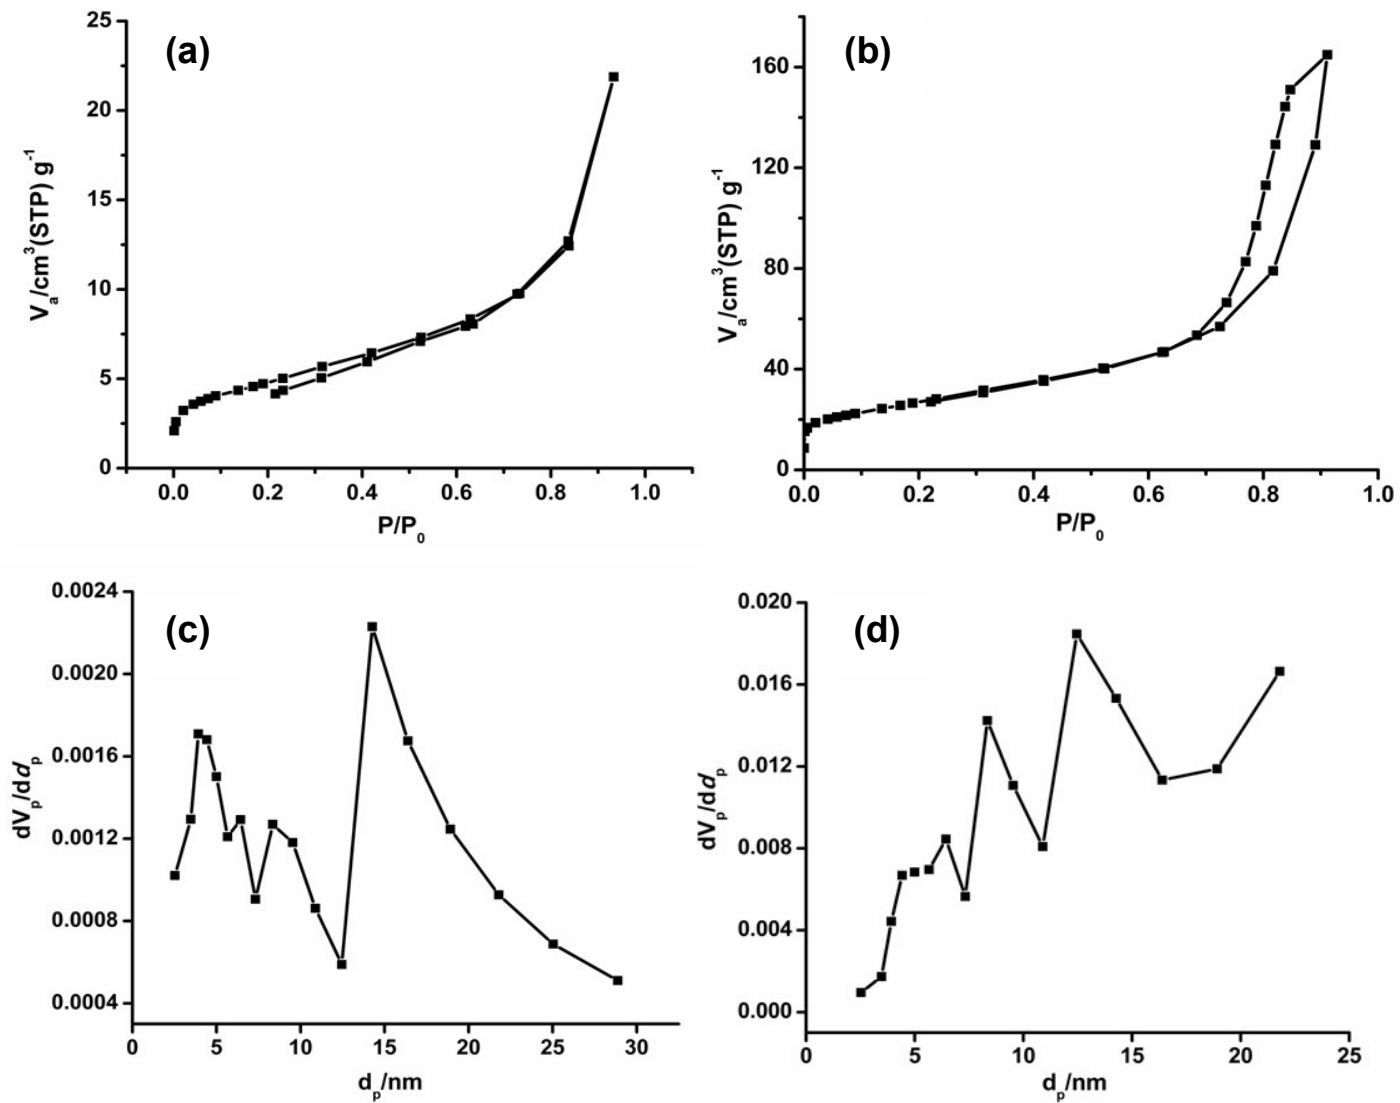

Figure S6. BET adsorption-desorption isotherms of a) TiO<sub>2</sub> b) LaTiO<sub>2</sub> and BJH pore size distribution of c) TiO<sub>2</sub> d) 4 % LaTiO<sub>2</sub>

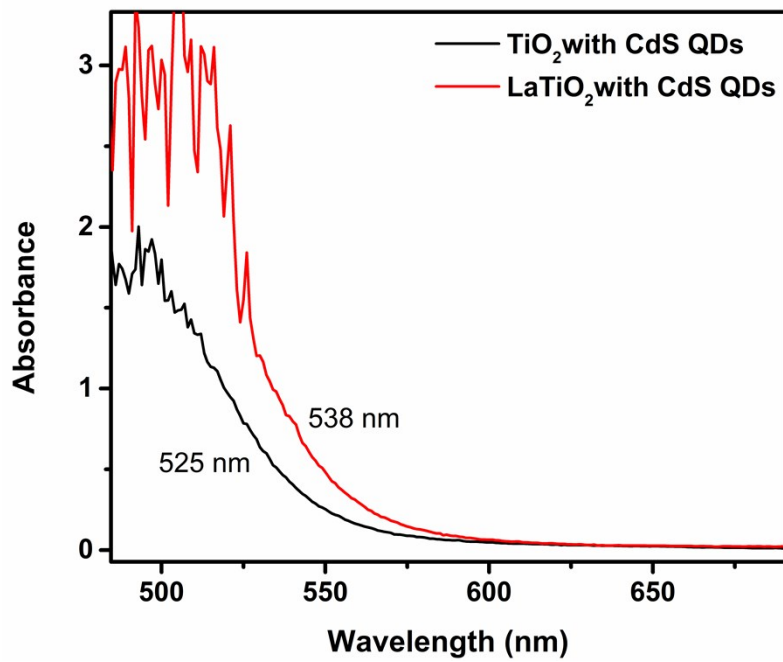

Figure S7. UV-visible absorption spectra of  $\text{TiO}_2$  and  $\text{La-TiO}_2$  with SILAR deposited CdS QDs
